# Supplementary material for: Back to Where It Was First Described: Vectors of Sylvatic Yellow Fever Transmission in the 2017 Outbreak in Espírito Santo, Brazil
Source: MDPI journal article supplement (doi:10.3390/v14122805), 2022-12-15
Supplement: s1 [file s1]

File: **Stanzani 2022\_Viruses\_Supplementary Material**

Manuscript titled:

**Back to where it was first described: Vectors of sylvatic yellow fever transmission in the 2017 outbreak in Espírito Santo, Brazil**

Corresponding authors:

Luciana Matos de Abreu Stanzani - [luciana.abreu@ufes.br](mailto:luciana.abreu@ufes.br)

Ricardo Lourenço-de-Oliveira - [lourenco@ioc.fiocruz.br](mailto:lourenco@ioc.fiocruz.br)

**Supplementary Table S1.** Number of adults and immature mosquitoes collected per sampling method and time from February to June 2017 in Cariacica (CA), Pancas (PA), Venda Nova do Imigrante (VNa and VNb), and Santa Teresa (STa and STb), Espírito Santo.

| Sampling      | Sampling Method      | Cronology                                                      | Level in the forest | Site | EW <sup>1</sup> when the 1 <sup>st</sup> YFV was recorded | Number of mosquitoes collected per site | Total Number of collected mosquitoes |
|---------------|----------------------|----------------------------------------------------------------|---------------------|------|-----------------------------------------------------------|-----------------------------------------|--------------------------------------|
| Adults 1      | PHA <sup>2</sup>     | February/ 2017<br>(6 <sup>th</sup> - 9 <sup>th</sup> EW)       | Ground              | VNa  | 3 <sup>rd</sup>                                           | 829                                     | 6350                                 |
|               |                      |                                                                |                     | VNb  | 3 <sup>rd</sup>                                           | 1081                                    |                                      |
|               |                      |                                                                |                     | STa  | 3 <sup>rd</sup>                                           | 890                                     |                                      |
|               |                      |                                                                |                     | STb  | 3 <sup>rd</sup>                                           | 310                                     |                                      |
|               |                      |                                                                |                     | CA   | 7 <sup>th</sup>                                           | 2007                                    |                                      |
|               |                      |                                                                |                     | PA   | 2 <sup>nd</sup>                                           | 1233                                    |                                      |
| Adults 2      | PHA                  | March to June/2017<br>(11 <sup>th</sup> - 26 <sup>th</sup> EW) | Ground and Canopy   | VNa  | 3 <sup>rd</sup>                                           | 1856                                    | 3793                                 |
|               |                      |                                                                |                     | PA   | 2 <sup>nd</sup>                                           | 1937                                    |                                      |
| Imma-<br>ture | Ovitrap <sup>3</sup> | April to June/2017<br>(19 <sup>th</sup> - 22 <sup>nd</sup> )   |                     | VNa  | 3 <sup>rd</sup>                                           | 257                                     | 515                                  |
|               |                      |                                                                |                     | CA   | 7 <sup>th</sup>                                           | 258                                     |                                      |
| Total         |                      |                                                                |                     |      |                                                           |                                         | 10658                                |

<sup>1</sup>EW = Epidemiological week; <sup>2</sup>PHA = Protected Human Attraction; <sup>3</sup>Ovitrap<sup>3</sup> = Traditional ovitraps and bamboo traps.

**Supplementary Table S2.** Adult mosquitoes belonging to the Aedini and Sabethini tribes with potential role in yellow fever transmission<sup>1</sup> collected in Cariacica (CA), Pancas (PA), Venda Nova do Imigrante (VNa and VNb), and Santa Teresa (STa and STb), Espírito Santo, during and after the peak of the epidemic (Adult samplings 1 and 2) from February to June 2017.

| Species                            | Adult Sampling 1 (AS1) |      |      |      |      |      |       |                     | Adult Sampling 2 (AS2) |      |       |                     | AS1 + AS2 + Immature Sampling |      |      |      |      |      |       |                     |
|------------------------------------|------------------------|------|------|------|------|------|-------|---------------------|------------------------|------|-------|---------------------|-------------------------------|------|------|------|------|------|-------|---------------------|
|                                    | CA                     | PA   | STa  | STb  | VNa  | VNb  | Total | Ab (%) <sup>3</sup> | PA                     | VNa  | Total | Ab (%) <sup>3</sup> | CA                            | PA   | STa  | STb  | VNa  | VNb  | Total | Ab (%) <sup>3</sup> |
| <i>Hg. leucocelaenus</i>           | 112                    | 104  | 74   | 24   | 18   | 7    | 339   | 5.34                | 67                     | 68   | 135   | 3.56                | 112                           | 171  | 74   | 24   | 86   | 7    | 474   | 4.45                |
| <i>Ae. scapularis</i>              | 2                      | 132  | 187  | 31   | 2    |      | 354   | 5.57                | 51                     | 1    | 52    | 1.37                | 2                             | 183  | 187  | 31   | 3    |      | 406   | 3.81                |
| <i>Sh. fluviatilis</i>             | 46                     |      | 11   |      | 80   | 36   | 173   | 2.72                |                        | 34   | 34    | 0.90                | 53                            |      | 11   |      | 234  | 36   | 334   | 3.13                |
| <i>Ps. ferox</i>                   | 8                      | 95   | 91   | 4    |      | 22   | 220   | 3.46                | 46                     | 1    | 47    | 1.24                | 8                             | 141  | 91   | 4    | 1    | 22   | 267   | 2.51                |
| <i>Ae. albopictus</i>              | 7                      | 77   | 4    | 106  |      | 1    | 195   | 3.07                | 18                     |      | 18    | 0.47                | 7                             | 95   | 4    | 106  |      | 1    | 213   | 2.00                |
| <i>Sa. soperi</i>                  | 166                    |      | 1    |      |      |      | 167   | 2.63                |                        |      |       | 0.00                | 172                           |      | 1    |      |      |      | 173   | 1.62                |
| <i>Ae. Serratus</i> Group          | 2                      | 31   | 38   | 1    | 2    | 1    | 75    | 1.18                | 21                     |      | 21    | 0.55                | 2                             | 52   | 38   | 1    | 2    | 1    | 96    | 0.90                |
| <i>Ae. aureolineatus</i>           | 35                     |      | 17   | 1    | 23   |      | 76    | 1.20                |                        | 6    | 6     | 0.16                | 35                            |      | 17   | 1    | 29   |      | 82    | 0.77                |
| <i>Ps. albipes</i>                 |                        | 69   |      |      |      |      | 69    | 1.09                | 5                      |      | 5     | 0.13                |                               | 74   |      |      |      |      | 74    | 0.69                |
| <i>Hg. janthinomys/capricornii</i> | 10                     | 2    | 7    | 17   | 1    |      | 37    | 0.58                | 19                     | 14   | 33    | 0.87                | 10                            | 21   | 7    | 17   | 15   |      | 70    | 0.66                |
| <i>Sa. albiprivus</i>              | 3                      |      | 11   |      | 17   |      | 31    | 0.49                | 7                      | 13   | 20    | 0.53                | 3                             | 7    | 11   |      | 30   |      | 51    | 0.48                |
| <i>Sa. chloropterus</i>            |                        | 12   | 4    |      |      |      | 16    | 0.25                | 21                     |      | 21    | 0.55                |                               | 33   | 4    |      |      |      | 37    | 0.35                |
| <i>Sa. identicus</i>               | 19                     |      |      |      | 2    | 5    | 26    | 0.41                | 1                      | 1    | 2     | 0.05                | 19                            | 1    |      |      | 3    | 5    | 28    | 0.26                |
| <i>Ae. aegypti</i>                 |                        |      | 1    |      |      |      | 1     | 0.02                |                        |      |       | 0.00                |                               |      | 1    |      |      |      | 1     | 0.01                |
| <i>Sabethes</i> spp. <sup>4</sup>  | 151                    | 2    | 5    | 22   | 7    | 3    | 190   | 2.99                | 21                     | 37   | 58    | 1.53                | 176                           | 23   | 5    | 22   | 45   | 3    | 274   | 2.57                |
| Subtotal                           | 561                    | 524  | 451  | 206  | 152  | 75   | 1969  | 31.00               | 277                    | 175  | 452   | 11.91               | 599                           | 801  | 451  | 206  | 448  | 75   | 2580  | 24.21               |
| Other species                      | 1446                   | 709  | 439  | 104  | 677  | 1006 | 4381  | 68.99               | 1660                   | 1681 | 3341  | 88.08               | 1666                          | 2369 | 439  | 104  | 2494 | 1006 | 8078  | 75.79               |
| Total                              | 2007                   | 1233 | 890  | 310  | 829  | 1081 | 6350  |                     | 1937                   | 1681 | 3793  |                     | 2265                          | 3170 | 890  | 310  | 2942 | 1081 | 10658 |                     |
| Shannon-Weaver index               | 1.35                   | 1.15 | 1.24 | 0.91 | 1.33 | 0.97 | 1.51  |                     | 1.19                   | 1.11 | 1.26  |                     | 1.38                          | 1.24 | 1.24 | 0.91 | 1.33 | 0.97 | 1.50  |                     |

<sup>1</sup>Mosquitoes species found naturally infected with YFV in previous studies and/or in this survey or demonstrated to be competent to transmit the virus experimentally. <sup>2</sup>Total of mosquitoes (adults and immatures) collected with all sampling methods and time. <sup>3</sup>Ab (%) = Relative abundance calculated by dividing the number of mosquitoes of one species by the number of mosquitoes of all species × 100. <sup>4</sup>Other species of genus *Sabethes*.

**Supplementary Table S3.** Mosquito species found at ground and canopy levels during adult sampling 2 in Pancas (PA) and Venda Nova do Imigrante (VNa), Espírito Santo, from March to June 2017.

| Species                         | Level  | PA    |       |     |      |          |     | VNa   |       |     |      |          | Total | pValue <sup>1</sup> |
|---------------------------------|--------|-------|-------|-----|------|----------|-----|-------|-------|-----|------|----------|-------|---------------------|
|                                 |        | March | April | May | June | Subtotal |     | March | April | May | June | Subtotal |       |                     |
| <i>Wy. palmata/ galvaoi</i>     | Canopy | 45    | 114   | 83  | 121  | 363      | 407 | 34    | 17    | 49  | 9    | 109      | 472   | 774 0.1275          |
|                                 | Ground | 11    | 7     | 13  | 13   | 44       |     | 186   | 23    | 39  | 10   | 258      | 302   |                     |
| <i>Wy. aff. davisii</i>         | Canopy | 14    | 50    | 31  | 63   | 158      | 171 | 61    | 24    | 42  | 15   | 142      | 300   | 490 0.0659          |
|                                 | Ground | 6     | 1     | 3   | 3    | 13       |     | 112   | 21    | 39  | 5    | 177      | 190   |                     |
| <i>Wy. incaudata</i>            | Canopy | 16    | 13    | 18  | 15   | 62       | 89  |       | 102   | 55  | 62   | 219      | 281   | 374 0.0651          |
|                                 | Ground | 8     | 6     | 6   | 7    | 27       |     | 14    | 13    | 26  | 13   | 66       | 93    |                     |
| <i>Hg. leucocelaenus</i>        | Canopy | 3     | 5     | 1   | 46   | 55       | 67  | 29    | 5     | 6   |      | 40       | 95    | 135 0.6698          |
|                                 | Ground | 5     |       |     | 7    | 12       |     | 5     | 14    | 9   |      | 28       | 40    |                     |
| <i>On. personatum</i>           | Canopy | 4     | 11    | 15  | 4    | 34       | 89  |       |       |     | 2    | 2        | 36    | 104 0.2875          |
|                                 | Ground | 13    | 18    | 11  | 13   | 55       |     | 11    |       | 1   | 1    | 13       | 68    |                     |
| <i>Wy. edwardsi</i>             | Canopy | 10    | 27    | 14  | 2    | 53       | 57  | 33    | 104   | 69  | 21   | 227      | 280   | 311 <b>0.0080</b>   |
|                                 | Ground | 2     | 2     |     |      | 4        |     |       | 3     | 22  | 2    | 27       | 31    |                     |
| <i>Li. durhamii</i>             | Canopy | 1     |       |     |      | 1        | 333 |       |       |     |      | 0        | 1     | 338 <b>0.0092</b>   |
|                                 | Ground | 226   | 40    | 35  | 31   | 332      |     |       | 3     |     | 2    | 5        | 337   |                     |
| <i>Wy. mystes</i>               | Canopy | 1     | 2     |     |      | 3        | 109 |       | 3     |     | 2    | 5        | 8     | 164 <b>0.0008</b>   |
|                                 | Ground | 36    | 16    | 41  | 13   | 106      |     | 12    | 6     | 20  | 12   | 50       | 156   |                     |
| <i>Wy. pillicauda</i>           | Canopy | 15    | 16    | 39  | 38   | 108      | 112 |       | 1     | 4   |      | 5        | 113   | 122 0.1470          |
|                                 | Ground | 1     | 1     | 1   | 1    | 4        |     |       | 2     | 3   |      | 5        | 9     |                     |
| <i>Wy. incaudata/pillicauda</i> | Canopy |       |       |     |      |          | 0   | 129   |       |     |      | 129      | 129   | 129 0.3816          |
|                                 | Ground |       |       |     |      |          |     |       |       |     |      | 0        | 0     |                     |
| <i>Wy. bourrouli/forcipenis</i> | Canopy |       | 3     | 4   |      | 7        | 91  |       |       |     |      | 0        | 7     | 95 <b>0.0433</b>    |
|                                 | Ground | 45    | 13    | 14  | 12   | 84       |     | 1     | 3     |     |      | 4        | 88    |                     |
| <i>Ae. scapularis</i>           | Canopy |       |       |     |      |          | 51  |       |       |     |      | 0        | 0     | 52 <b>0.0325</b>    |
|                                 | Ground | 32    | 8     |     | 11   | 51       |     |       |       |     | 1    | 1        | 52    |                     |
| <i>Wy. bonnei/deanei</i>        | Canopy | 8     | 13    | 16  | 7    | 44       | 49  | 1     |       |     |      | 1        | 45    | 54 0.1601           |
|                                 | Ground | 4     | 1     |     |      | 5        |     | 4     |       |     |      | 4        | 9     |                     |
| <i>Ps. ferox</i>                | Canopy |       |       |     |      |          | 46  |       |       |     |      | 0        | 0     | 47 0.0764           |
|                                 | Ground | 44    |       |     | 2    | 46       |     | 1     |       |     |      | 1        | 47    |                     |

|                                    |        |    |    |    |    |    |    |    |    |   |   |    |    |        |
|------------------------------------|--------|----|----|----|----|----|----|----|----|---|---|----|----|--------|
| <i>Wy. palmata</i>                 | Canopy | 11 | 4  | 6  | 29 | 50 |    |    |    | 0 |   | 50 |    |        |
|                                    | Ground |    |    | 2  |    | 2  | 52 |    |    | 0 | 0 | 2  | 52 | 0.0847 |
| <i>Hg. janthinomys/capricornii</i> | Canopy | 4  | 4  |    | 11 | 19 |    | 9  | 3  | 2 |   | 14 |    |        |
|                                    | Ground |    |    |    |    |    | 19 |    |    |   |   | 0  | 14 | 0.0045 |
| <i>Wy. muehlensi</i>               | Canopy |    |    |    |    |    |    |    |    |   |   | 0  |    |        |
|                                    | Ground | 7  | 31 |    |    | 38 | 38 |    |    |   |   | 0  | 0  | 0.1709 |
| <i>Wyeomyia (Pho.) spp.</i>        | Canopy | 3  |    | 10 | 3  | 16 |    | 1  | 1  | 1 |   | 3  |    |        |
|                                    | Ground | 2  | 4  | 2  | 1  | 9  | 25 | 15 | 1  | 2 | 8 | 26 | 29 | 0.2181 |
| <i>Ru. frontosa</i>                | Canopy |    |    |    |    |    |    | 5  |    |   |   | 5  |    |        |
|                                    | Ground | 3  |    | 2  |    | 5  | 5  | 11 | 2  | 6 | 6 | 25 | 30 | N/A    |
| <i>Sh. fluviatilis</i>             | Canopy |    |    |    |    |    |    |    |    |   |   | 0  |    |        |
|                                    | Ground |    |    |    |    |    | 0  | 26 | 3  | 2 | 3 | 34 | 34 | N/A    |
| <i>Wy. confusa</i>                 | Canopy |    |    |    |    |    |    |    |    |   |   | 0  |    |        |
|                                    | Ground |    |    |    |    |    | 0  | 7  | 12 | 7 | 8 | 34 | 34 | N/A    |
| <i>Ae. terrens</i>                 | Canopy |    |    |    |    |    |    | 5  | 4  | 4 |   | 13 |    |        |
|                                    | Ground | 1  |    |    |    | 1  | 1  | 5  | 5  | 8 | 1 | 19 | 32 | N/A    |
| <i>Sa. purpureus</i>               | Canopy |    |    |    |    |    |    | 12 | 4  | 4 | 5 | 25 |    |        |
|                                    | Ground |    |    |    |    |    | 0  |    | 1  | 1 | 2 | 4  | 29 | N/A    |
| <i>Wy. lutzi</i>                   | Canopy |    |    |    |    |    |    | 11 | 4  |   | 6 | 21 |    |        |
|                                    | Ground |    |    |    |    |    | 0  | 2  | 2  | 2 | 2 | 8  | 29 | N/A    |
| <i>Ae. Serratus Group</i>          | Canopy |    |    |    |    |    |    |    |    |   |   | 0  |    |        |
|                                    | Ground | 19 |    |    | 2  | 21 | 21 |    |    |   |   | 0  | 0  | N/A    |
| <i>Sa. chloropterus</i>            | Canopy | 4  | 7  | 6  | 1  | 18 |    |    |    |   |   | 0  |    |        |
|                                    | Ground | 3  |    |    |    | 3  | 21 |    |    |   |   | 0  | 0  | N/A    |
| <i>Sa. albiprivus</i>              | Canopy |    | 2  | 1  | 3  | 6  |    | 3  | 3  | 3 |   | 9  |    |        |
|                                    | Ground |    |    | 1  |    | 1  | 7  | 1  | 2  | 1 |   | 4  | 13 | N/A    |
| <i>Tr. castroi/similis</i>         | Canopy |    |    |    |    |    |    |    |    |   |   | 0  |    |        |
|                                    | Ground |    |    |    |    |    | 0  | 16 | 3  |   |   | 19 | 19 | N/A    |
| <i>Ae. albopictus</i>              | Canopy |    | 1  |    |    | 1  |    |    |    |   |   | 0  |    |        |
|                                    | Ground | 14 |    | 1  | 2  | 17 | 18 |    |    |   |   | 0  | 0  | N/A    |
| <i>Li. pseudomethysticus</i>       | Canopy |    |    |    |    |    | 0  | 2  |    |   |   | 2  | 16 | N/A    |

|                            |        |   |   |   |   |    |    |   |   |   |    |    |    |    |     |
|----------------------------|--------|---|---|---|---|----|----|---|---|---|----|----|----|----|-----|
|                            | Ground |   |   |   |   |    | 10 | 1 |   | 3 | 14 |    | 14 |    |     |
| <i>Sa. petrocchiaie</i>    | Canopy | 1 |   | 1 |   | 2  |    |   |   |   | 1  |    | 3  |    |     |
|                            | Ground | 1 | 5 | 2 |   | 8  |    |   | 2 |   | 2  | 3  | 10 | 13 | N/A |
| <i>Tr. pallidiventer</i>   | Canopy |   |   |   |   |    |    |   |   |   | 0  |    | 0  |    |     |
|                            | Ground |   |   |   |   |    | 10 |   | 1 |   | 11 | 11 | 11 | 11 | N/A |
| <i>Sa. forattinii</i>      | Canopy |   | 1 | 5 | 4 | 10 |    |   |   |   | 0  |    | 10 |    |     |
|                            | Ground |   |   |   |   |    |    |   |   |   | 0  | 0  | 0  | 10 | N/A |
| <i>Culex</i> spp.          | Canopy |   |   |   |   |    |    |   |   |   | 0  |    | 0  |    |     |
|                            | Ground | 7 |   | 3 | 1 | 11 |    | 1 |   | 1 | 2  | 2  | 13 | 13 | N/A |
| <i>Culex (Cux.)</i> spp.   | Canopy |   |   |   |   |    |    |   |   |   | 0  |    | 0  |    |     |
|                            | Ground | 5 | 1 |   |   | 6  |    | 1 |   |   | 1  | 1  | 7  | 7  | N/A |
| <i>Wyeomyia</i> spp.       | Canopy |   |   |   |   |    |    |   |   |   | 0  |    | 0  |    |     |
|                            | Ground | 1 | 1 | 2 |   | 4  |    |   | 1 |   | 2  | 2  | 6  | 6  | N/A |
| <i>Ma. titillans</i>       | Canopy |   |   |   |   |    |    |   |   |   | 0  |    | 0  |    |     |
|                            | Ground | 5 |   |   |   | 5  |    |   |   |   | 0  | 0  | 5  | 5  | N/A |
| <i>Ps. albipes</i>         | Canopy |   |   |   |   |    |    |   |   |   | 0  |    | 0  |    |     |
|                            | Ground | 4 | 1 |   |   | 5  |    |   |   |   | 0  | 0  | 5  | 5  | N/A |
| <i>Cx. neglectus</i>       | Canopy |   |   | 1 |   | 1  |    |   |   |   | 0  |    | 1  |    |     |
|                            | Ground |   |   |   |   |    |    |   | 1 |   | 1  | 1  | 1  | 2  | N/A |
| <i>Cx. nigripalpus</i>     | Canopy |   |   |   |   |    |    | 1 |   |   | 1  |    | 1  |    |     |
|                            | Ground |   |   | 1 |   | 1  |    |   |   |   | 0  | 1  | 1  | 2  | N/A |
| <i>Sa. identicus</i>       | Canopy |   |   |   |   |    | 1  |   |   |   | 1  |    | 1  |    |     |
|                            | Ground | 1 |   |   |   | 1  |    |   |   |   | 0  | 1  | 1  | 2  | N/A |
| <i>Cx. declarator</i>      | Canopy |   |   |   |   |    |    |   |   |   | 0  |    | 0  |    |     |
|                            | Ground |   |   | 1 |   | 1  |    |   |   |   | 0  | 0  | 1  | 1  | N/A |
| <i>Cx. imitator</i>        | Canopy |   |   | 1 |   | 1  |    |   |   |   | 0  |    | 1  |    |     |
|                            | Ground |   |   |   |   |    |    |   |   |   | 0  | 0  | 0  | 1  | N/A |
| <i>Mansonia (Man.)</i> sp. | Canopy |   |   |   |   |    |    |   |   |   | 0  |    | 0  |    |     |
|                            | Ground | 1 |   |   |   | 1  |    |   |   |   | 0  | 0  | 1  | 1  | N/A |
| <i>Sa. batesi</i>          | Canopy |   |   | 1 |   | 1  |    |   |   |   | 0  |    | 1  |    |     |
|                            | Ground |   |   |   |   |    |    |   |   |   | 0  | 0  | 0  | 1  | N/A |
| <i>Wy. sabetha</i>         | Canopy |   |   |   |   |    |    |   |   |   | 0  | 0  | 0  | 1  | N/A |

|                              |        |            |            |            |            |             |            |            |            |            |             |             |     |
|------------------------------|--------|------------|------------|------------|------------|-------------|------------|------------|------------|------------|-------------|-------------|-----|
|                              | Ground | 1          | 1          |            |            |             | 0          |            |            |            | 1           |             |     |
| <i>Ae. aureolineatus</i>     | Canopy |            | 0          |            |            |             | 0          |            |            |            | 0           | 6           | N/A |
|                              | Ground |            |            |            |            |             | 3          |            |            |            | 6           |             |     |
| <i>Li. flavisetosus</i>      | Canopy |            | 0          |            |            |             | 0          |            |            |            | 0           | 5           | N/A |
|                              | Ground |            |            |            |            |             | 2          |            |            |            | 5           |             |     |
| <i>Sa. aurescens</i>         | Canopy |            | 0          |            |            |             | 0          |            |            |            | 0           | 5           | N/A |
|                              | Ground |            |            |            |            |             | 3          |            |            |            | 5           |             |     |
| <i>An. cruzii</i>            | Canopy |            | 0          |            |            |             | 3          |            |            |            | 4           | 4           | N/A |
|                              | Ground |            |            |            |            |             | 1          |            |            |            | 0           |             |     |
| <i>Wy. dyari</i>             | Canopy |            | 0          |            |            |             | 0          |            |            |            | 0           | 4           | N/A |
|                              | Ground |            |            |            |            |             | 4          |            |            |            | 4           |             |     |
| <i>Ru. Cerqueirai</i>        | Canopy |            | 0          |            |            |             | 0          |            |            |            | 0           | 3           | N/A |
|                              | Ground |            |            |            |            |             | 2          |            |            |            | 3           |             |     |
| <i>An. laneanus?</i>         | Canopy |            | 0          |            |            |             | 1          |            |            |            | 2           | 2           | N/A |
|                              | Ground |            |            |            |            |             | 1          |            |            |            | 0           |             |     |
| <i>Anopheles (Ker.) spp.</i> | Canopy |            | 0          |            |            |             | 1          |            |            |            | 2           | 2           | N/A |
|                              | Ground |            |            |            |            |             | 1          |            |            |            | 0           |             |     |
| <i>Ae. fulvithorax</i>       | Canopy |            | 0          |            |            |             | 0          |            |            |            | 0           | 1           | N/A |
|                              | Ground |            |            |            |            |             | 1          |            |            |            | 1           |             |     |
| <i>Ru. humboldti</i>         | Canopy |            | 0          |            |            |             | 0          |            |            |            | 0           | 1           | N/A |
|                              | Ground |            |            |            |            |             | 1          |            |            |            | 1           |             |     |
| <i>Trichoprosopon spp.</i>   | Canopy |            | 0          |            |            |             | 0          |            |            |            | 0           | 1           | N/A |
|                              | Ground |            |            |            |            |             | 1          |            |            |            | 1           |             |     |
| <i>Wy. codiocalpa</i>        | Canopy |            | 0          |            |            |             | 1          |            |            |            | 1           | 1           | N/A |
|                              | Ground |            |            |            |            |             | 1          |            |            |            | 0           |             |     |
| <i>Wy. aff. limai</i>        | Canopy |            | 0          |            |            |             | 1          |            |            |            | 1           | 1           | N/A |
|                              | Ground |            |            |            |            |             | 1          |            |            |            | 0           |             |     |
| <i>Limatus spp.</i>          | Canopy |            | 0          |            |            |             | 0          |            |            |            | 0           | 1           | N/A |
|                              | Ground |            |            |            |            |             | 1          |            |            |            | 1           |             |     |
| <b>Total</b>                 |        | <b>648</b> | <b>429</b> | <b>394</b> | <b>466</b> | <b>1937</b> | <b>810</b> | <b>397</b> | <b>437</b> | <b>212</b> | <b>1856</b> | <b>3,79</b> |     |

<sup>1</sup>p-Value calculated using the Mann–Whitney U test with 5% significance (p < 0.05); N/A = not applicable.

**Supplementary Table S4.** Mosquito species tested for natural infection by YFV in Cariacica (CA), Pancas (PA), Venda Nova do Imigrante (VNa and VNb), and Santa Teresa (STa and STb) from February to June 2017.

|                                     | Number of tested pools (Number of positive pools) |        |        |        |       |       |                  |                  |                        |        |                      |       |                 |                   |
|-------------------------------------|---------------------------------------------------|--------|--------|--------|-------|-------|------------------|------------------|------------------------|--------|----------------------|-------|-----------------|-------------------|
| Sampling/Local                      | Adults Sampling 1                                 |        |        |        |       |       |                  |                  | Adults Sam-<br>pling 2 |        | Immature<br>Sampling |       | Total<br>Tested | Total<br>Positive |
| Species                             | CA                                                | PA     | STa    | STb    | VNa   | VNb   | MIR <sup>1</sup> | MLE <sup>2</sup> | PA                     | VNa    | CA                   | VNa   | Pools           | Pools             |
| <i>Hg. leucocelaenus</i>            | 23 (4)                                            | 22 (0) | 16 (1) | 5 (2)  | 5 (3) | 2 (1) | 32.5             | 32.1             | 18 (0)                 | 17 (0) |                      |       | 108             | 11                |
| <i>Hg. janthinomys/capricornii</i>  | 2 (1)                                             | 2 (1)  | 2 (0)  | 5 (0)  | 1 (0) |       | 54.1             | 35.8             | 5 (0)                  | 7 (0)  |                      |       | 24              | 2                 |
| <i>Sa. chloropterus</i>             |                                                   | 3 (1)  | 2 (0)  |        |       |       | 62.5             | 43.6             | 7 (0)                  |        |                      |       | 12              | 1                 |
| <i>Sa. identicus</i>                | 4 (1)                                             |        |        |        | 2 (0) | 2 (0) | 38.5             | 26.4             | 1 (0)                  | 1 (0)  |                      |       | 10              | 1                 |
| <i>Sa. soperi</i>                   | 33 (2)                                            |        | 1 (0)  |        |       |       | 12.3             | 12.1             |                        |        | 1 (0)                |       | 35              | 2                 |
| <i>Ae. aureolineatus</i>            | 4 (0)                                             |        | 3 (1)  | 1 (0)  | 4 (0) |       | 14.3             | 8.7              |                        | 3 (0)  |                      |       | 15              | 1                 |
| <i>Sh. fluviatilis</i>              | 5 (0)                                             |        | 1 (0)  |        | 9 (0) | 4 (1) | 5.9              | 5.4              |                        |        |                      |       | 19              | 1                 |
| <i>Ae. fulvithorax</i>              |                                                   |        |        |        | 1 (0) |       | 0                | 0                |                        |        |                      |       | 1               | 0                 |
| <i>Ae. scapularis</i>               | 1 (0)                                             | 16 (0) | 21 (0) | 4 (0)  | 2 (0) |       | 0                | 0                | 6 (0)                  | 1 (0)  |                      |       | 51              | 0                 |
| <i>Ae. Serratus Group</i>           | 1 (0)                                             | 4 (0)  | 7 (0)  | 1 (0)  | 1 (0) | 1 (0) | 0                | 0                | 4 (0)                  |        |                      |       | 19              | 0                 |
| <i>Ae. taeniorhynchus</i>           |                                                   |        | 1 (0)  |        |       |       | 0                | 0                |                        |        |                      |       | 1               | 0                 |
| <i>Ae. terrens</i>                  | 1 (0)                                             | 2 (0)  | 3 (0)  |        | 4 (0) | 1 (0) | 0                | 0                | 1 (0)                  | 8 (0)  |                      |       | 20              | 0                 |
| <i>Ae. aegypti</i>                  |                                                   |        | 1 (0)  |        |       |       | 0                | 0                |                        |        |                      |       | 1               | 0                 |
| <i>Ae. albopictus</i>               | 2 (0)                                             | 10 (0) | 3 (0)  | 12 (0) |       | 1 (0) | 0                | 0                | 7 (0)                  |        |                      |       | 35              | 0                 |
| <i>Ps. albipes</i>                  |                                                   | 9 (0)  |        |        |       |       | 0                | 0                | 2 (0)                  |        |                      |       | 11              | 0                 |
| <i>Ps. albipes/albigenu/varipes</i> |                                                   | 2 (0)  |        |        |       |       | 0                | 0                |                        |        |                      |       | 2               | 0                 |
| <i>Ps. ferox</i>                    | 1 (0)                                             | 11 (0) | 11 (0) | 1 (0)  |       | 2 (0) | 0                | 0                | 6 (0)                  | 1 (0)  |                      |       | 33              | 0                 |
| <i>Ps. lanei</i>                    |                                                   |        | 1 (0)  |        |       | 1 (0) | 0                | 0                |                        |        |                      |       | 2               | 0                 |
| <i>Sa. petrocchiaie</i>             |                                                   |        |        | 4 (0)  | 1 (0) |       | 0                | 0                | 4 (0)                  | 2 (0)  |                      |       | 11              | 0                 |
| <i>Sa. aurescens</i>                | 5 (0)                                             |        |        |        | 1 (0) |       | 0                | 0                |                        | 2 (0)  |                      |       | 8               | 0                 |
| <i>Sa. fabricii</i>                 |                                                   |        |        |        |       |       | 0                | 0                |                        |        | 4 (0)                | 1 (0) | 5               | 0                 |
| <i>Sa. undosus/fabricii</i>         | 18 (0)                                            |        | 1 (0)  |        | 1 (0) |       | 0                | 0                |                        |        | 1 (0)                |       | 21              | 0                 |
| <i>Sa. aff. ignotus</i>             | 2 (0)                                             |        |        |        |       |       | 0                | 0                |                        |        |                      |       | 2               | 0                 |
| <i>Sa. whitmani</i>                 | 2 (0)                                             |        |        |        |       |       |                  |                  |                        |        |                      |       | 2               | 0                 |
| <i>Sa. albiprivus</i>               | 2 (0)                                             |        | 3 (0)  |        | 5 (0) |       | 0                | 0                | 4 (0)                  | 6 (0)  |                      |       | 20              | 0                 |
| <i>Sa. batesi</i>                   | 1 (0)                                             |        |        |        |       |       | 0                | 0                | 1 (0)                  |        |                      |       | 2               | 0                 |
| <i>Sa. forattinii</i>               |                                                   |        |        |        |       |       | 0                | 0                | 2 (0)                  |        |                      |       | 2               | 0                 |
| <i>Sa. purpureus</i>                | 2 (0)                                             |        |        |        | 1 (0) | 1 (0) | 0                | 0                |                        | 9 (0)  |                      |       | 13              | 0                 |
| <i>Sa. intermedius</i>              | 1 (0)                                             |        | 1 (0)  |        |       |       | 0                | 0                |                        |        |                      |       | 2               | 0                 |

|                                 |         |         |         |        |         |         |   |   |        |        |       |       |     |    |
|---------------------------------|---------|---------|---------|--------|---------|---------|---|---|--------|--------|-------|-------|-----|----|
| <i>Sa. melanonymphe</i>         | 2 (0)   | 1 (0)   |         |        |         |         | 0 | 0 |        |        |       | 3     | 0   |    |
| <i>Sa. xhyphydes</i>            | 1 (0)   | 1 (0)   | 1 (0)   |        |         |         | 0 | 0 |        |        |       | 3     | 0   |    |
| <i>Wy. shannoni</i>             | 2 (0)   |         |         |        |         |         | 0 | 0 |        |        |       | 2     | 0   |    |
| <i>Wy. lutzii</i>               | 1 (0)   | 1 (0)   | 3 (0)   | 1 (0)  | 4 (0)   | 2 (0)   | 0 | 0 |        |        |       | 12    | 0   |    |
| <i>Wy. bonnei/deanei</i>        | 1 (0)   | 3 (0)   |         |        | 2 (0)   | 5 (0)   | 0 | 0 |        |        |       | 11    | 0   |    |
| <i>Wy. aff. davisi</i>          | 3 (0)   | 5 (0)   | 4 (0)   |        | 7 (0)   | 42 (0)  | 0 | 0 |        |        |       | 61    | 0   |    |
| <i>Wy. edwardsi</i>             | 1 (0)   | 3 (0)   | 4 (0)   |        | 6 (0)   | 4 (0)   | 0 | 0 |        |        |       | 18    | 0   |    |
| <i>Wy. incaudata</i>            | 9 (0)   | 4 (0)   | 4 (0)   |        | 3 (0)   | 4 (0)   | 0 | 0 |        |        |       | 24    | 0   |    |
| <i>Wy. pillicauda</i>           | 2 (0)   | 3 (0)   |         |        |         | 2 (0)   | 0 | 0 |        |        |       | 7     | 0   |    |
| <i>Wy. incaudata/pilicauda</i>  |         |         |         |        | 5 (0)   | 1 (0)   | 0 | 0 |        |        |       | 6     | 0   |    |
| <i>Wy. palmata/ galvaoi</i>     | 2 (0)   | 6 (0)   | 3 (0)   |        | 5 (0)   | 25 (0)  | 0 | 0 |        |        |       | 41    | 0   |    |
| <i>Wy. confusa</i>              | 1 (0)   | 1 (0)   |         |        | 9 (0)   | 4 (0)   | 0 | 0 |        |        |       | 15    | 0   |    |
| <i>Wy. bourrouli/forcipenis</i> | 5 (0)   | 14 (0)  | 3 (0)   | 2 (0)  | 2 (0)   | 1 (0)   | 0 | 0 |        |        |       | 27    | 0   |    |
| <i>Wy. mystes</i>               | 7 (0)   | 5 (0)   | 3 (0)   | 1 (0)  | 5 (0)   |         | 0 | 0 |        |        |       | 21    | 0   |    |
| <i>Li. durhamii</i>             | 26 (0)  | 32 (0)  | 4 (0)   | 1 (0)  | 3 (0)   |         | 0 | 0 |        |        |       | 66    | 0   |    |
| <i>Li. pseudomethysticus</i>    | 34 (0)  |         | 15 (0)  | 1 (0)  | 4 (0)   |         | 0 | 0 |        |        |       | 54    | 0   |    |
| <i>On. personatum</i>           | 4 (0)   | 1 (0)   | 3 (0)   | 6 (0)  | 5 (0)   | 4 (0)   | 0 | 0 |        |        |       | 23    | 0   |    |
| <i>Ru. frontosa</i>             | 3 (0)   | 2 (0)   | 6 (0)   |        | 8 (0)   | 1 (0)   | 0 | 0 |        |        |       | 20    | 0   |    |
| <i>Tr. castroi/similis</i>      | 23 (0)  |         | 3 (0)   | 1 (0)  | 12 (0)  | 2 (0)   | 0 | 0 |        |        |       | 41    | 0   |    |
| <i>Tr. pallidiventer</i>        | 4 (0)   | 1 (0)   | 5 (0)   |        | 6 (0)   | 5 (0)   | 0 | 0 |        |        |       | 21    | 0   |    |
| Total                           | 241 (8) | 164 (2) | 139 (2) | 46 (2) | 124 (3) | 117 (2) |   |   | 68 (0) | 57 (0) | 6 (0) | 1 (0) | 963 | 19 |

<sup>1</sup>Minimum infection rate = number of YFV-positive pools / number of adults tested for this species × 1,000; <sup>2</sup>Maximum likelihood estimate per 1,000 mosquitoes =  $1 - (1 - Y / X)^{(1 / m)}$ , where Y is the number of positive pools, X is the total number of pools, and m is the size of each tested pool.

**Supplementary Table S5.** Number of YFV-positive mosquito pools correlated with the time elapsed between the first YFV record and the date of adult sampling 1 in Cariacica (CA), Pancas (PA), Venda Nova do Imigrante (VNa and VNb), and Santa Teresa (STa and STb), Espírito Santo, 2017.

| Local | EW <sup>1</sup><br>of the<br>1 <sup>st</sup> YFV record | EW of collec-<br>tion               | Time elapsed between the 1 <sup>st</sup> YFV record<br>in human or/and NHPs and the begin-<br>ning of mosquito collection date | Number of<br>positive<br>pools |
|-------|---------------------------------------------------------|-------------------------------------|--------------------------------------------------------------------------------------------------------------------------------|--------------------------------|
| VNa   | 3 <sup>rd</sup>                                         | 6 <sup>th</sup>                     | 3 weeks                                                                                                                        | 3                              |
| VNb   | 3 <sup>rd</sup>                                         | 6 <sup>th</sup> and 7 <sup>th</sup> | 3 weeks                                                                                                                        | 2                              |
| PA    | 2 <sup>nd</sup>                                         | 8 <sup>th</sup> and 9 <sup>th</sup> | 6 weeks                                                                                                                        | 2                              |
| STa   | 3 <sup>rd</sup>                                         | 8 <sup>th</sup>                     | 5 weeks                                                                                                                        | 2                              |
| STb   | 3 <sup>rd</sup>                                         | 8 <sup>th</sup>                     | 5 weeks                                                                                                                        | 2                              |
| CA    | 7 <sup>th</sup>                                         | 9 <sup>th</sup>                     | 2 weeks                                                                                                                        | 8                              |

<sup>1</sup>EW (Epidemiological week, corresponding to the week of the year).
